# Supplementary material for: Impact of branching on the viscoelasticity of wormlike reverse micelles
Source: Royal Society of Chemistry journal article supplement (doi:10.1039/c2sm26528a), 2012-01-01
Supplement: c2sm26528a.pdf [file c2sm26528a.pdf]

## IMPACT OF BRANCHING ON THE WORMLIKE REVERSE MICELLES VISCOELASTICITY

Ruggero Angelico<sup>a,b,\*</sup>, Samiul Amin<sup>c,#</sup>, Maura Monduzzi<sup>a,d</sup>, Sergio Murgia<sup>a,d</sup>, Ulf Olsson<sup>e</sup>, and Gerardo Palazzo<sup>a,f,\*</sup>

<sup>a</sup>*Consorzio per lo sviluppo dei Sistemi a Grande Interfase (CSGI), Firenze (FI), Italy.*

<sup>b</sup>*Università del Molise (DIAAA), v. De Sanctis, I-86100 Campobasso (CB), Italy.*

<sup>c</sup>*Malvern Instruments Limited, Malvern, Worcestershire, WR141XZ, United Kingdom*

<sup>d</sup>*Dipartimento di Scienze Chimiche e Geologiche, Università di Cagliari, I-09042 Monserrato (CA), Italy.*

<sup>e</sup>*Physical Chemistry, Lund University, SE-221 00 Lund, Sweden.*

<sup>f</sup>*Dipartimento di Chimica, Università di Bari, v. Orabona 4, I-70126 Bari (BA), Italy.*

Figure S1

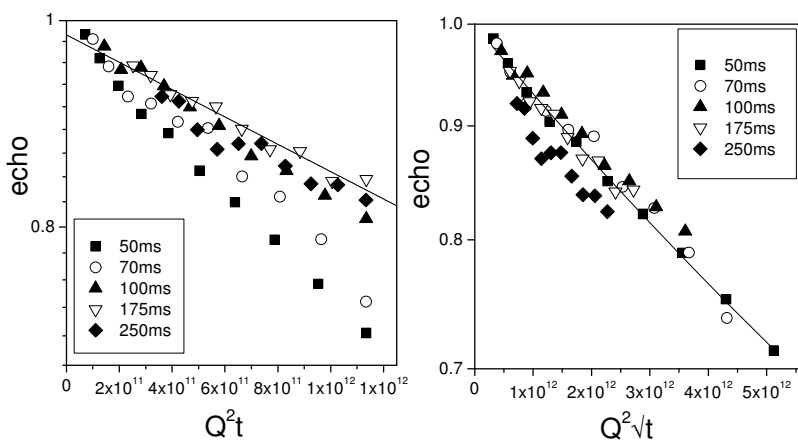

Semilog plots of normalized lecithin echo decays of sample F ( $R=0$  and  $W_0=2.0$ ).

A) Steskjal-Tanner plot (the abscissa is  $Q^2t$ ) the straight line is the best fit of the data at  $t > 100$  ms to Eq. 1.

B) curvilinear plot (the abscissa is  $Q^2\sqrt{t}$ ) the curve is the best fit of the data at  $t < 100$  ms to Eq. 2.

Figure S2

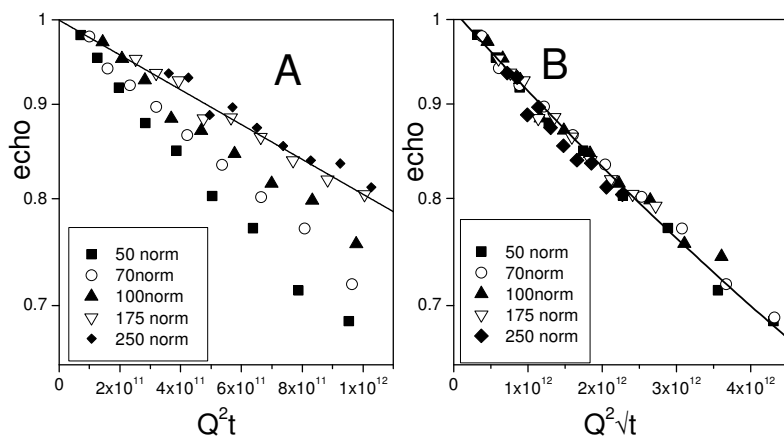

Semilog plots of normalized lecithin echo decays of sample FE ( $R=0.1$  and  $W_0= 2.4$ ).

A) Steskjal-Tanner plot (the abscissa is  $Q^2t$ ) the straight line is the best fit of the data at  $t>100$  ms to Eq. 1.

B) curvilinear plot (the abscissa is  $Q^2\sqrt{t}$ ) the curve is the best fit of the data at  $t<100$  ms to Eq. 2.

Figure S3

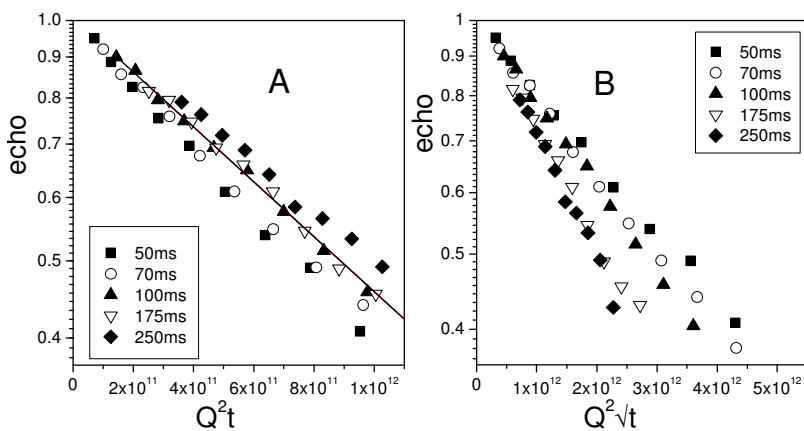

Semilog plots of normalized lecithin echo decays of sample C ( $R=0.64$  and  $W_0= 6.6$ ).

A) Steskjal-Tanner plot (the abscissa is  $Q^2t$ ) the straight line is the best fit of all the data to Eq. 1.

B) curvilinear plot (the abscissa is  $Q^2\sqrt{t}$ ).



Figure S4

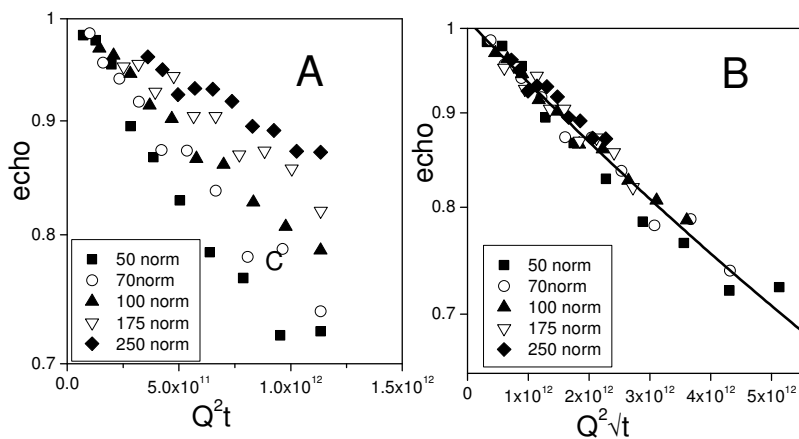

Semilog plots of normalized lecithin echo decays of sample AB ( $R=0.9$  and  $W_0=8.8$ ).

A) Steskjal-Tanner plot (the abscissa is  $Q^2t$ ).

B) curvilinear plot (the abscissa is  $Q^2\sqrt{t}$ ) the curve is the best fit of the data to Eq. 2.

Figure S5

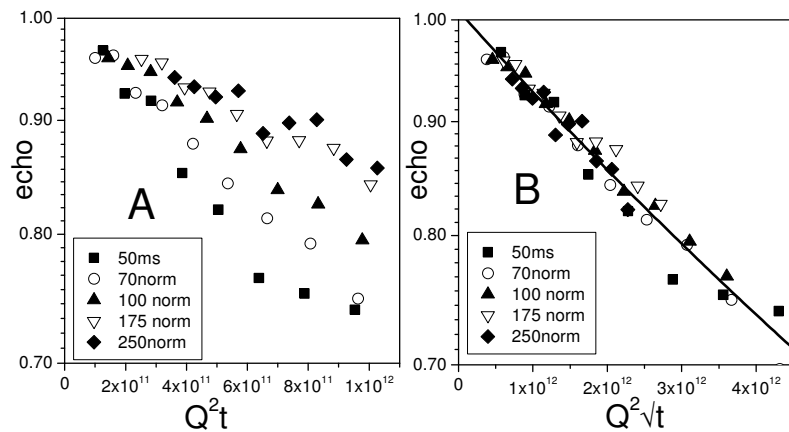

Semilog plots of normalized lecithin echo decays of sample A ( $R=1$  and  $W_0=10.0$ ). A) Steskjal-Tanner plot (the abscissa is  $Q^2t$ ). B) curvilinear plot (the abscissa is  $Q^2\sqrt{t}$ ) the curve is the best fit of the data to Eq. 2.

Figure S6

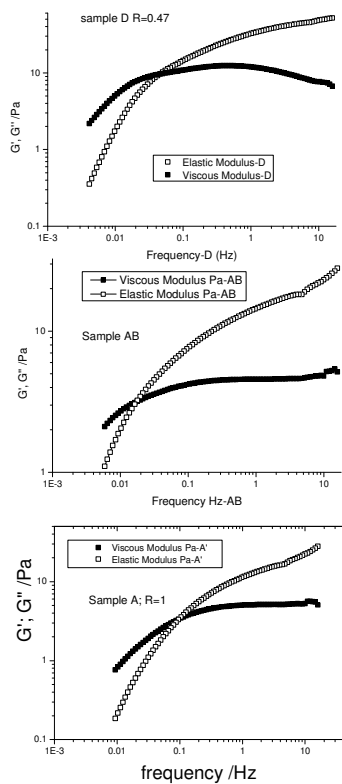

Oscillatory rheology experiments: isothermal ( $t=25^\circ\text{C}$ ) frequency sweep measurements performed in the linear viscoelastic regime of representative organogels; upper panel) sample D  $R=0.47$  and  $W_0=5.2$ ; middle panel) sample AB  $R=0.9$  and  $W_0=8.8$ ; lower panel) sample A  $R=1$  (neat cyclohexane) and  $W_0=10$ . For all the panels open symbols denote the elastic (storage) modulus  $G'$  and filled symbols denote the viscous (loss) modulus  $G''$ .
